# Supplementary material
Source: PubMed Central journal article supplement (PMC4642861)
Supplement: NIHMS732123-supplement-Suppl.pdf [file NIHMS732123-supplement-Suppl.pdf]

Appendix Table 2. Item-response probabilities of cigarette harm perceptions for a three latent class model

|                                                                                                               | <b>Overall</b> | <b>Class I</b> | <b>Class II</b> | <b>Class III</b> |
|---------------------------------------------------------------------------------------------------------------|----------------|----------------|-----------------|------------------|
| <b>Size (n) (unweighted)</b>                                                                                  | 24,658         | 1,608          | 15,438          | 7,612            |
| <b>Probability of class membership (weighted)</b>                                                             |                | 0.0643         | 0.5894          | 0.3463           |
| <b>“How much do you think people harm themselves when they smoke 10 or more cigarettes every day?”</b>        |                |                |                 |                  |
| <b>A lot of harm</b>                                                                                          | 0.880          | 0.1152         | 0.9770          | 0.8564           |
| <b>Some harm</b>                                                                                              | 0.073          | 0.3674         | 0.0150          | 0.1162           |
| <b>Little harm</b>                                                                                            | 0.024          | 0.1972         | 0.0058          | 0.0241           |
| <b>No harm</b>                                                                                                | 0.023          | 0.3202         | 0.0021          | 0.0033           |
| <b>“How much do you think people harm themselves when they smoke a few cigarettes every day?”</b>             |                |                |                 |                  |
| <b>A lot of harm</b>                                                                                          | 0.643          | 0.0478         | 0.9894          | 0.1622           |
| <b>Some harm</b>                                                                                              | 0.266          | 0.0498         | 0.0093          | 0.7439           |
| <b>Little harm</b>                                                                                            | 0.066          | 0.5218         | 0.0000          | 0.0940           |
| <b>No harm</b>                                                                                                | 0.025          | 0.3806         | 0.0003          | 0.0000           |
| <b>“How much do you think people harm themselves when they smoke cigarettes some days but not every day?”</b> |                |                |                 |                  |
| <b>A lot of harm</b>                                                                                          | 0.333          | 0.0444         | 0.5455          | 0.0240           |
| <b>Some harm</b>                                                                                              | 0.428          | 0.0559         | 0.4534          | 0.4526           |
| <b>Little harm</b>                                                                                            | 0.204          | 0.4003         | 0.0000          | 0.5145           |
| <b>No harm</b>                                                                                                | 0.036          | 0.4993         | 0.0012          | 0.0089           |

Number of estimated parameters=29; -2(log likelihood)= 102644.73; AIC=102702.73; BIC=102938.00 00 in the unweighted analysis.

Likelihood values and AIC/BIC measures in this and the following table are presented for the unweighted analysis, given that weighted maximum likelihood estimation procedures do not maximize the actual log-likelihood function for the data and model and thus these values are often not reported for the weighted analysis by statistical software. Weighted maximum likelihood estimation procedures do, however, maximize related functions, and the estimates from the weighted analysis were comparable to those from the unweighted analysis.
